# Supplementary material for: Population Pharmacodynamic Modelling of the CD19+ Suppression Effects of Rituximab in Paediatric Patients with Neurological and Autoimmune Diseases
Source: MDPI journal article supplement (doi:10.3390/pharmaceutics15112534), 2023-10-26
Supplement: s1 [file s1]

## **Supplementary materials index**

### **Supplementary figures**

**Figure S1.**

**Figure S2.**

### **Supplementary Tables**

**Table S1.** Full description of patient diagnosis

**Table S2.** Demographic characteristics of the subgroup of patients (n=26) with assessment of clinical efficacy

**Table S3.** Univariate analysis of risk factors for the lack of response to treatment with rituximab (n=26).

**Figure S1.** Simulated CD19+ B lymphocyte individual profiles stratified according to clinical response (n=26)

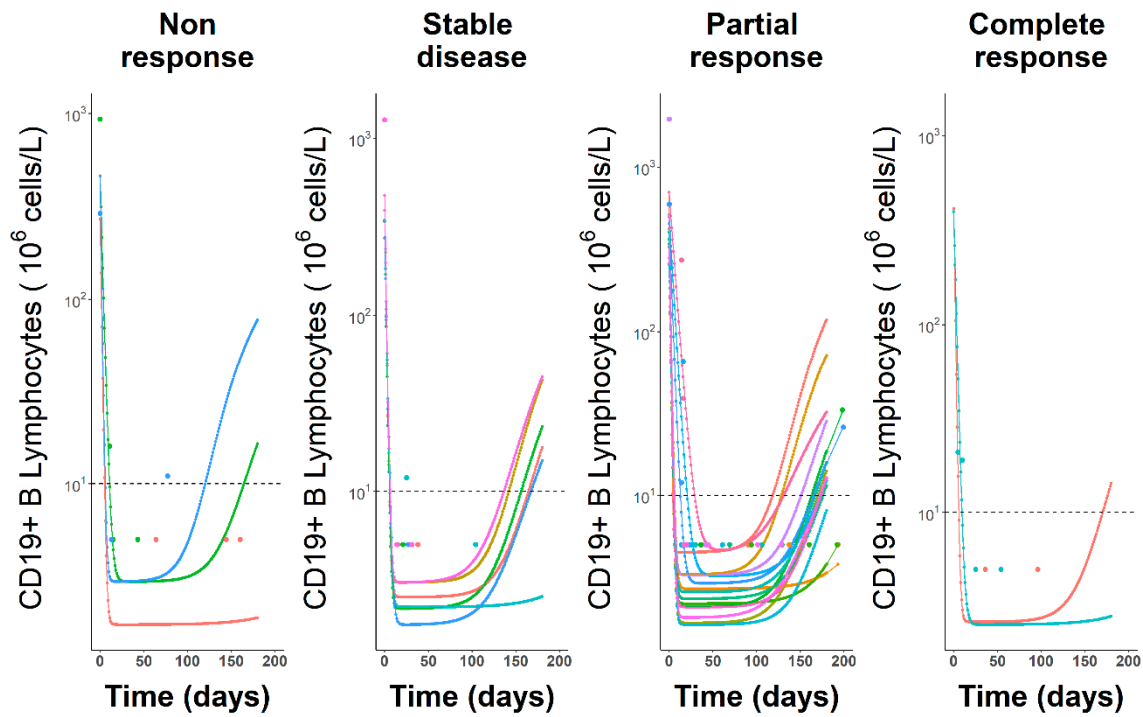

**Figure S2.** Evaluation of the time of CD19+ repopulation and the area under the CD19+ versus time curve in patients with satisfactory (CR or PR) and non-satisfactory (NR or SD) clinical response

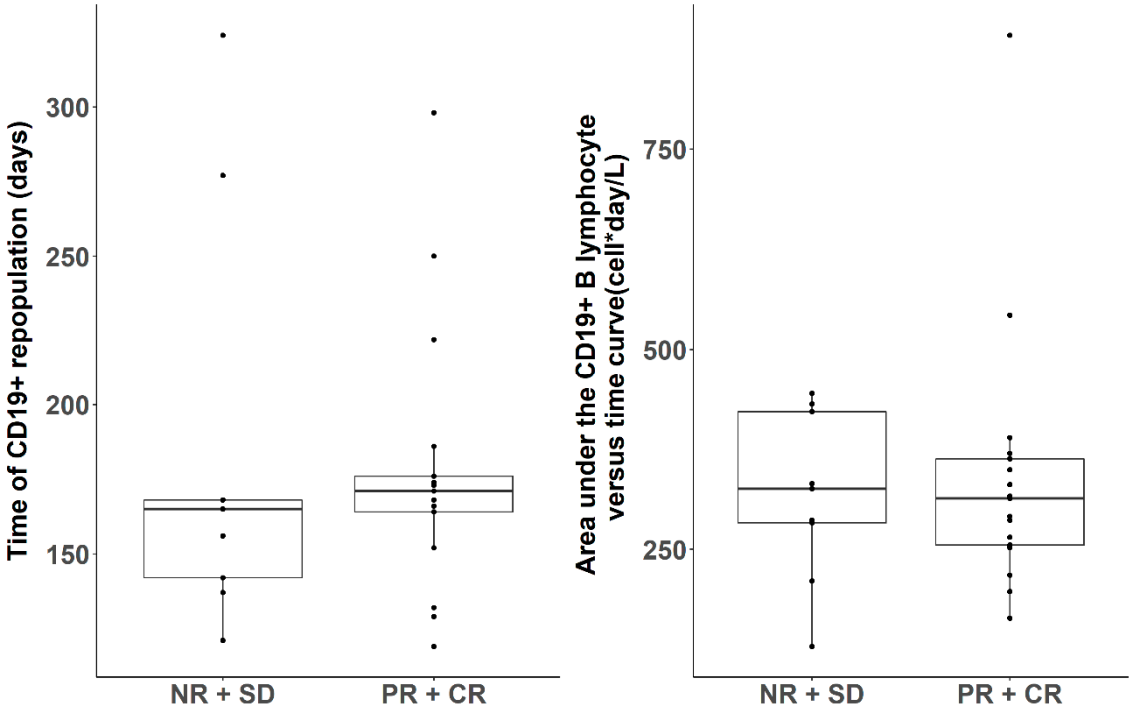

**Table S1.** Full description of patient diagnosis

| <b>Neurologic Diagnosis</b>                    | <b>Number of<br/>patients of the<br/>study population<br/>(n=52)</b> | <b>External predictive<br/>performance<br/>evaluation cohort<br/>(n=11)</b> |
|------------------------------------------------|----------------------------------------------------------------------|-----------------------------------------------------------------------------|
| Immune-mediated encephalitis                   | 5                                                                    |                                                                             |
| Multiple Sclerosis                             | 5                                                                    | 1                                                                           |
| Neuromyelitis Optica                           | 5                                                                    | 3                                                                           |
| ADEM                                           | 2                                                                    |                                                                             |
| Pompe disease                                  | 2                                                                    |                                                                             |
| Demyelinating disease                          | 2                                                                    |                                                                             |
| CNS inflammatory disease                       | 2                                                                    |                                                                             |
| Seropositive immunomodulated<br>encephalopathy | 1                                                                    |                                                                             |
| Immune-mediated epilepsy                       | 1                                                                    |                                                                             |
| Myasthenia Gravis                              | 1                                                                    |                                                                             |
| Myeloradiculitis                               | 1                                                                    |                                                                             |
| Syndrome of Susac                              | 1                                                                    |                                                                             |
| Syndrome Opsoclonus Myoclonus                  | 1                                                                    |                                                                             |
| Chronic ataxia                                 | 1                                                                    |                                                                             |
| <b>Immune-Haemato-rheumatology</b>             |                                                                      |                                                                             |
| <b>Diagnosis</b>                               |                                                                      |                                                                             |
| Systemic lupus erythematosus                   | 11                                                                   | 3                                                                           |
| AIHA                                           | 3                                                                    | 1                                                                           |
| Juvenile dermatomyositis                       | 3                                                                    |                                                                             |

|                            |   |   |
|----------------------------|---|---|
| Pemphigus                  | 1 | 1 |
| ESJ                        | 1 |   |
| ANCA-associated vasculitis | 1 |   |
| Thrombocytopenia           | 1 |   |
| DiGeorge Syndrome          | 1 |   |

---

**Abbreviations:** ADEM: acute disseminated encephalomyelitis, AIHA: autoimmune haemolytic anemia; ANCA: antineutrophil cytoplasmic antibody, CNS: central nervous system, ESJ: juvenile systemic sclerosis.

**Table S2.** Demographic characteristics of the subgroup of patients (n=26) with assessment of clinical efficacy

| Variable                                     | Neurologic             | Immune-Haemato-           | Total                  |
|----------------------------------------------|------------------------|---------------------------|------------------------|
|                                              | Diagnosis              | rheumatology<br>Diagnosis |                        |
| No. patients                                 | 16                     | 10                        | 26                     |
| Age (y.o.)                                   | 13.0 (1.7-15.4)        | 12.6 (3.2-18.7)           | 12.9 (1.7-18.7)        |
| BSA (m <sup>2</sup> )                        | 1.3 (0.5-2.0)          | 1.4 (0.8-1.7)             | 1.4 (0.5-2.0)          |
| Body weight (kg)                             | 42 (12-87)             | 46 (21-65)                | 46 (12-87)             |
| Sex (Fem/Male)                               | 9/7                    | 9/1                       | 18/8                   |
| CD19+ <sub>0</sub> (x10 <sup>6</sup> cel/L)  | 769 (122-1953)         | 443 (87-1617)             | 726 (87-1953)          |
| Switch (yes/no/NA)                           | 3/9/4                  | 2/5/3                     | 5/14/7                 |
| AUC <sub>0-180</sub> (cell*day/L)*           | 320.7<br>(128.8-891.7) | 288.4<br>(163.9-542.6)    | 314.6<br>(128.8-891.7) |
| TCD19+ (days)                                | 166 (119-324)          | 170 (121-298)             | 168 (119-324)          |
| Time of clinical score<br>evaluation (days*) | 120 (27-412)           | 55 (21-111)               | 85 (21-412)            |
| Clinical response<br>(NR/SD/PR/CR)           | 1/4/10/1               | 2/2/5/1                   | 3/6/15/2               |
| No. of patients with Co-medication (%)       |                        |                           |                        |
| Cyclophosphamide                             | 1 (6.2)                | 1 (11.1)                  | 2 (7.7)                |
| Methotrexate                                 | 0 (0)                  | 0 (0)                     | 0 (0)                  |
| Steroids                                     | 13 (81)                | 7 (70)                    | 20 (77)                |
| Intravenous immunoglobulin                   | 1 (6.2)                | 0 (0)                     | 1 (3.8)                |

Data are expressed as median (range).

Abbreviations: AUC<sub>0-180</sub>: area of CD19+B lymphocytes vs time curve at 180 days after initiation of rituximab; BSA: body surface area; CR: complete response; NR: non-response; PR: partial response; SD: stable disease; T<sub>CD19+</sub>: Time to CD19+ repopulation.

**Table S3.** Univariate analysis of risk factors for the lack of response to treatment with rituximab (n=26)

| Factor                                                | Odds Ratio (IC 95%)          | P value |
|-------------------------------------------------------|------------------------------|---------|
| Sex (male vs female)                                  | 0.182 (-1.550 – 1.920)       | 0.84    |
| Diagnose (IHR vs neurologic)                          | 0.383 (-1.260 – 2.030)       | 0.65    |
| Switch between innovative and biosimilars (yes vs no) | 0.061 (-2.380 – 2.500)       | 0.96    |
| AUC <sub>0-180</sub> (cell*day/L)                     | 0.002 (-0.003 – 0.007)       | 0.39    |
| T <sub>CD19+</sub> (days)                             | 0.002 (-0.013 – 0.018)       | 0.78    |
| Age at baseline (y.o.)                                | 0.111 (-0.079 – 0.301)       | 0.25    |
| Female teenagers (yes/no)                             | 0.891 (-1.100 – 2.880)       | 0.38    |
| BSA at baseline (m <sup>2</sup> )                     | 1.146 (-0.690 – 2.980)       | 0.22    |
| Body weight at baseline (kg)                          | 0.022 (-0.019 – 0.063)       | 0.29    |
| Absolute lymphocyte counts at baseline (cell/L)       | 1.945e-05 (-0.0005 – 0.0005) | 0.94    |
| Steroids (yes/no)                                     | 1.482 (-0.870 – 3.830)       | 0.22    |

Abbreviations: AUC<sub>0-180</sub>: area of CD19+B lymphocytes vs time curve at 180 days after initiation of rituximab; BSA: body surface area; IHR: immune-haemato-rheumatologic diseases, T<sub>CD19+</sub>: Time to CD19+ repopulation
